# Supplementary material for: Lineage specific evolution of the VNTR composite retrotransposon central domain and its role in retrotransposition of gibbon LAVA elements
Source: PubMed Central journal article supplement (PMC4432496; doi:10.1186/s12864-015-1543-z), 2015-05-16
Supplement: 12864_2015_1543_MOESM1_ESM.pdf [file 12864_2015_1543_MOESM1_ESM.pdf]

**Figure S1**

**Sequence evolution within repeat unit (RU) types across SVA2/SVA<sub>NLE/HSA</sub>/PVA/FVA (A) and LAVA (B) families/ subfamilies.** Alignments of consensus sequences generated for the respective RU type in the families/ subfamilies are shown. SVA\_A to SVA\_F denote human SVA subfamilies.

MMU – *Macaca mulatta*, NLE – *Nomascus leucogenys*, HSA – *Homo sapiens*

**A**

|            | <b>A-type RUs</b>                         | <b>C-type RUs</b> |                                              |
|------------|-------------------------------------------|-------------------|----------------------------------------------|
| SVA2_MMU_A | CCCTCTGCCGGCCCGCCGACCGTCTGGGAAGTGAGGAGCGG | SVA_NLE_C         | CCTCTGCCGGCCCGCCCGCCGACCGTCTGGGAAGTGAGGAGCGG |
| SVA2_NLE_A | .....                                     | PVA_C             | .....                                        |
| SVA_NLE_A  | .....A.C.....A                            | FVA_C             | .....T                                       |
| PVA_A      | .....A.C.....A                            | SVA_A_C           | .....                                        |
| FVA_A      | .....C.....G..G.....                      | SVA_B_C           | .....C                                       |
| SVA_A_A_5' | .....A.C.....A                            | SVA_C_C           | .....                                        |
| SVA_B_A_5' | .....A.C.....A                            | SVA_D_C           | .....                                        |
| SVA_C_A_5' | .....A.C.....A                            | SVA_E_C           | .....H                                       |
| SVA_D_A_5' | .....A.C.....A                            | SVA_F_C           | .....                                        |
| SVA_E_A_5' | .....A.C.....A                            | SVA_D_C'          | .....TA                                      |
| SVA_F_A_5' | .....A.C.....Y                            | SVA_E_C'          | .....TA                                      |
| SVA_A_A    | .....A.C.....A                            | SVA_E_C''         | .....TA                                      |
| SVA_B_A    | .....M..A.C.....                          | SVA_F_C'          | .....TA                                      |
| SVA_C_A    | .....M..A.C.....A                         |                   |                                              |
| SVA_D_A    | .....A.C.....A                            |                   |                                              |
| SVA_E_A    | .....A..A.C.....V                         |                   |                                              |
| SVA_F_A    | .....Y.....A..A.C.....                    |                   |                                              |

  

|         | <b>E- and G-type RUs</b>                 | <b>H- and I-type RUs</b> |                                               |
|---------|------------------------------------------|--------------------------|-----------------------------------------------|
| SVA_B_E | TCTCCGCCGG-CAGCCGCCCGTCCGGGAGGTGGGGGGCAG | SVA_B_H                  | CCCCCGCCCGCCAGCCRCRCCCGTCCGGGAGG---TGGGGGGCAG |
| SVA_C_E | .....                                    | SVA_C_H                  | ..T...T.....                                  |
| SVA_B_G | C.C.Y.....C.....                         | SVA_B_I                  | .....GAGG.....GC.                             |
| SVA_C_G | C.C.....C.....Y.....                     | SVA_C_I                  | .....GAGG.....                                |
| SVA_D_G | C.C.....C.....A.....                     |                          |                                               |
| SVA_E_G | C.C.....C.....A.....                     |                          |                                               |
| SVA_F_G | C.C.....C.....A.....                     |                          |                                               |

  

|          | <b>F-, K- and L-type RUs</b>                    |
|----------|-------------------------------------------------|
| SVA_D_F  | TCTCCGCCGGCA-GCCACCCCGTCCGGGAGGAGGTGGGGGGTTCAGC |
| SVA_E_F  | .....                                           |
| SVA_F_F  | .....                                           |
| SVA_D_K  | C.C.....CA..G.....                              |
| SVA_E_K  | C..T.....CA..G.....                             |
| SVA_F_K  | C.C.....CA..G.....                              |
| SVA_E_L' | -----CA..G.....                                 |
| SVA_E_L  | C..T.....CA..G.....GGGT                         |



**B - continued**

**D-type RUs**

LAVA\_B1A\_D CCTCTGCCCGGCCCGCTCTGGGAAGAGTGAGGAGCG  
LAVA\_B1D\_D .....  
LAVA\_B1R\_D .....  
LAVA\_B1B\_D .....  
LAVA\_B1M\_D .....  
LAVA\_B2R2\_D .....  
LAVA\_B2E\_D .....  
LAVA\_B2R1\_D .....  
LAVA\_B2A\_D .....R  
LAVA\_B2B\_D .....  
LAVA\_B1G\_D .....  
LAVA\_B1L\_D .....  
LAVA\_B1F\_D .....  
LAVA\_C1\_D .....  
LAVA\_C2\_D .....  
LAVA\_C2\_D\_C2 .....A...C.A..  
LAVA\_C4\_D .....  
LAVA\_D\_D .....C..  
LAVA\_E\_D .....C..  
LAVA\_F0\_D .....C..  
LAVA\_F\_D .....C.....

**N-type RUs**

LAVA\_C1\_N TCTCTGCTGGCGCCCGCCCTCTGCCCGGCCCGCTCTGGGAAGTGAGGAGCG  
LAVA\_C4\_N .....T...A..  
LAVA\_E\_N .....C.....T...A.....

**O-type RUs**

LAVA\_E\_O CCTCTGCCCGGCCCGCCCTCTGGGAAGAGTGAGGAGCG  
LAVA\_F0\_O .....C..  
LAVA\_F\_O .....C.....

**P-type RUs**

LAVA\_E\_P CCTCTGCCCGGCCCGCCCGCTCTGGGAAGAGTGAGGAGCG  
LAVA\_F0\_P .....C..  
LAVA\_F\_P .....C.....

**Figure S2**

**Position specific sequences of RUs in the younger human and chimpanzee (A) and orangutan (B) SVA subfamilies.** Alignments of consensus sequences generated for the RUs at specific positions are shown. Chimpanzee RUs are denoted with Pt.

**A**

**A-type RUs**

|           |                                         |
|-----------|-----------------------------------------|
| SVA_D_A1  | CCTCTGCCCGCCGCCACCCCGTCTGGGAAGTGAGGAGCG |
| SVA_E_A1  | .....                                   |
| SVA_F_A1  | .....Y.                                 |
| SVA_Pt_A1 | .....T..A.....                          |
| SVA_D_A2  | .....T..A..A..A.....                    |
| SVA_E_A2  | .....T..A..A..A..C.....                 |
| SVA_F_A2  | .....T..C.....T..A..A..A.....           |
| SVA_Pt_A2 | .....T.....T..A..A..A.....              |
| SVA_D_A3  | .....T.....T..A..A..A.....              |
| SVA_E_A3  | .....T..C.....T..A..A..A.....           |
| SVA_F_A3  | .....T..R.....T..A..A..A.....           |
| SVA_Pt_A3 | .....T.....T..A..A..A.....              |
| SVA_D_A4  | .....TG.....G.....G.....G.....          |
| SVA_E_A4  | .....TG.....A.....T.....G.....          |
| SVA_F_A4  | .....AG.....G.....                      |
| SVA_D_A5  | .....T..AA..G..Y..A.....A.....C         |
| SVA_E_A5  | .....T..AA..G.....A.....C               |
| SVA_F_A5  | .....Y..AA.....A.....C                  |
| SVA_Pt_A5 | .....T..AA..G.....A.....C               |
| SVA_D_A6  | .....C.....A..G.....A.....C             |
| SVA_E_A6  | .....C.T.....A.....A.....C              |
| SVA_F_A6  | .....C.....A..TG.....A.....C            |
| SVA_Pt_A6 | .....C.....A.....A.....                 |
| SVA_D_A7  | .....C.....A.....A.....                 |
| SVA_F_A7  | T..C.....A.....A.....                   |

**B-type RUs**

|            |                                          |
|------------|------------------------------------------|
| SVA_D_B_1  | TCTCTGCCTGGCGCCGCCATCGTCTGGGATGTGAGGAGCC |
| SVA_E_B_1  | .....A.....                              |
| SVA_F_B_1  | .....C.....A.....                        |
| SVA_Pt_B_1 | .....C.....A.....A.....G.....G           |
| SVA_D_B_2  | .....C.....A.....A.....G.....A           |
| SVA_E_B_2  | .....C.....A.....A.....G.....A           |
| SVA_F_B_2  | .....C.....A.....A.....G.....G           |
| SVA_Pt_B_2 | .....C.....A.....A.....G.....A           |

**C-type RUs**

|           |                                           |
|-----------|-------------------------------------------|
| SVA_D_C1  | CCTCTGCCTGGCTGGCCCGCCAGTCTGGAAAGTGAGGAGCG |
| SVA_E_C1  | .....                                     |
| SVA_F_C1  | .....                                     |
| SVA_Pt_C1 | .....CC..C..C.....G.T.....                |
| SVA_D_C2  | .....CC..C..C..T.....G.T.....             |
| SVA_E_C2  | .....CC..C..C..CA.....G.T.....            |
| SVA_F_C2  | .....CT..C..C..C..C..G.T.....             |
| SVA_Pt_C2 | .....C..C..C..C..AG.....AC                |
| SVA_D_C3  | T.....C..C..C..C..AG.....AAC              |
| SVA_E_C3  | T.....C..C..C..C..AG.....AC               |
| SVA_F_C3  | T.....C..C..C..T.....AG.....AC            |
| SVA_Pt_C3 | T.....C..C..C..CTA.....G.....C            |
| SVA_D_C'  | .....C..C..C..CTA.....G.....C             |
| SVA_E_C'  | .....C..C..C..CTA.....G.....C             |
| SVA_F_C'  | .....C..C..C..CTA.....G.....C             |
| SVA_Pt_C' | .....C..C..C..CTA.....G.....C             |
| SVA_E_C_T | T.....C..C..C..CTA.....G.....C            |

**B**

**A-type RUs**

SVA\_Pa\_7\_A1 CCTCTGCCCCACGGCCACCCCGTCTAGGAAGTGAGGAGCG  
SVA\_Pa\_8\_A1 .....G.....  
SVA\_Pa\_9\_A1 .....G.....  
SVA\_Pa\_10\_A1 .....G.....  
SVA\_Pa\_11\_A1 .....G.....  
SVA\_Pa\_7\_A2 TGG.....Y.....  
SVA\_Pa\_8\_A2 TGG.....G.....  
SVA\_Pa\_9\_A2 TGG.....G.....  
SVA\_Pa\_10\_A2 TGG.....T.....  
SVA\_Pa\_11\_A2 TGG.....GA.....  
SVA\_Pa\_7\_A3 .....GG.T.....  
SVA\_Pa\_8\_A3 .....GG.T.....  
SVA\_Pa\_9\_A3 .....GG.T.....  
SVA\_Pa\_10\_A3 .....GG.T.....  
SVA\_Pa\_11\_A3 .....AG.....  
SVA\_Pa\_7\_A3' .....AG.....  
SVA\_Pa\_8\_A3' .....AG.....  
SVA\_Pa\_9\_A3' .....AG.....  
SVA\_Pa\_11\_A3' .....AG.....

**B-type RUs**

SVA\_Pa\_7\_B1 TCTCTGCGCTGGCCGCCCATCGTCTGGGATGTGAGGAGCC  
SVA\_Pa\_8\_B1 .....  
SVA\_Pa\_9\_B1 .....R..  
SVA\_Pa\_10\_B1 .....A..  
SVA\_Pa\_11\_B1 .....  
SVA\_Pa\_7\_B2 C.....A.....G  
SVA\_Pa\_8\_B2 C.....C.....G  
SVA\_Pa\_9\_B2 C.....C.....G  
SVA\_Pa\_10\_B2 C.....C.....G  
SVA\_Pa\_11\_B2 C.....A.....G

**C-type RUs**

SVA\_Pa\_7\_C1 CCTCTGCCCCGGCCCGCTATCTGGGAAGTGAGGAGCG  
SVA\_Pa\_8\_C1 .....  
SVA\_Pa\_9\_C1 .....  
SVA\_Pa\_10\_C1 .....  
SVA\_Pa\_11\_C1 .....CG.....  
SVA\_Pa\_7\_C .....CG.....  
SVA\_Pa\_8\_C .....CG.....  
SVA\_Pa\_9\_C .....CG.....  
SVA\_Pa\_10\_C .....CG.....  
SVA\_Pa\_11\_C .....CG.....V.....

**Q-type RUs**

SVA\_Pa\_7\_Q CCTCTGCGCTGGCCGCCACCCCGTCTGGGAAGTGAGGAGCG  
SVA\_Pa\_8\_Q .....C.....  
SVA\_Pa\_9\_Q .....C.....  
SVA\_Pa\_10\_Q .....C.....  
SVA\_Pa\_11\_Q .....C.....  
SVA\_Pa\_7\_Q\_3' .....C.T.....  
SVA\_Pa\_8\_Q\_3' .....C.T.....  
SVA\_Pa\_9\_Q\_3' .....C.T.....  
SVA\_Pa\_10\_Q\_3' .....C.T.....  
SVA\_Pa\_11\_Q\_3' .....C.T.....

**R-type RUs**

SVA\_Pa\_7\_R CCTCTGCCCCGGCCCGCTCTGGGAACCGGAGCG  
SVA\_Pa\_8\_R1 .....T.....  
SVA\_Pa\_8\_R2 .....  
SVA\_Pa\_9\_R .....  
SVA\_Pa\_10\_R .....  
SVA\_Pa\_11\_R .....  
SVA\_Pa\_11\_R\_3' .....T.....G.....T.....

**Figure S3 Orangutan SVA subfamilies and their phylogenetic relationships.**

(A) Multiple alignment of the consensus sequences obtained for the SINE-R part of orangutan SVA subfamilies. Note that the consensus of SVA\_PA\_1 is identical to that of human SVA\_A. (B) Median joining network constructed based on the consensus sequences shown in (A). Numbers indicate the number of substitutions separating the subfamilies. Short junctions not annotated represent one substitution. SVA\_PA\_12 is characterized by deletion of the 5' part of the SINE-R.

**A**

```

SVA_PA_1 CAGCTCCGAAGAGACAGCGACCATCGAGAACGGGCCATGATGACGATGGCGGTTTTGTGCGAAAAGAAAAGGGGAAATGTGGGAAAAGAAAGAGAGATCAGATTGTTAC
SVA_PA_2 .....T.....
SVA_PA_3 .....T.....
SVA_PA_4 .....T.....
SVA_PA_5 .....G..G.....G.....T.....GG.....G.....G..G.....G.
SVA_PA_6 .....G..GT.....G.....T.....GG.....G.....A..GA..G.....G.
SVA_PA_7 .....G..G.....G.....T..G.....GG..A.....G.....G.....G.
SVA_PA_8 .....G..G.....G.....T..G.....GG.....G.....G.....G.....G.
SVA_PA_9 .....G..G.....G.....T..G.....GG.....G.....G.....G.....G.
SVA_PA_10 .....G..G.C.....G.....T..G.....GG.....G.....G.....G.....G.
SVA_PA_11 .....G..G.....G..T.....T..G.....GG..A.....G.....G.....G.....G.
SVA_PA_12 -----

SVA_PA_1 TGTGCTGTGTAGAAAAGAAGTAGACATAGGAGACTCCATTTTGTCTGTACTAAGAAAAATCTTCTGCGCTTGGGATGCTGTTAATCTATAACCTTACCCCCAACCCCGT
SVA_PA_2 .....G.....G.....G.....G.....GG.....G.....G.....G.....
SVA_PA_3 .....G.....G.....G.....G.....GG.....G.....G.....G.....
SVA_PA_4 .....G.....G.....G.....G.....GG.....G.....G.....G.....
SVA_PA_5 .....G..G.G.....-..G..G.....G.....G.....GG.....T.....G.....
SVA_PA_6 .....G..G.G.....-..G..G.....G.....G.....GG.....T.....G.....
SVA_PA_7 .....GG..G..G.....-..G..G.....G.....G.....GG.....T.....G.....C.
SVA_PA_8 .....G..G.G.....-..G..G.....G.....G.....GG.....T.....G.....A.
SVA_PA_9 .....GG..G..G.....-..G..G.....G.....G.....GG.....T.....G.....A.
SVA_PA_10 .....GG..G..G.....T.....G..G.....G.....G.....GG.....T.....G.....A.
SVA_PA_11 .....GG..G..G.....-..G..G.....G.....CCGG.....T.....G.....
SVA_PA_12 -----

SVA_PA_1 GCTCTCTGAAACATGTGCTGTGCAACTCAGGGTTAAATGGATTAAAGGGCGGTGCAAGATGTGCTTTGTTAAACAGATGCTTGAAGGCAGCATGCTCGTTAAGAGTCATC
SVA_PA_2 .....T.....
SVA_PA_3 .....T.....
SVA_PA_4 .....C.....
SVA_PA_5 .....T.....
SVA_PA_6 .....T.....
SVA_PA_7 .....T.....
SVA_PA_8 .....A.....T.....
SVA_PA_9 .....A.....T.....
SVA_PA_10 .....A.....A.....T.....
SVA_PA_11 .....G.....T.....
SVA_PA_12 .....T.....

SVA_PA_1 ACCACTCCCTAATCTCAAGTACCCAGGGACACAACACTGCGGAAGGCCGCGAGGGACCTCTGCCTAGGAAAACCAGAGACCTTGTTCACGTGTTTATCTGCTGACCTTC
SVA_PA_2 .....T.....
SVA_PA_3 .....A.....T.....
SVA_PA_4 .....T.....
SVA_PA_5 .....G.....A.....T.....C.....
SVA_PA_6 .....A.....T.....C.....
SVA_PA_7 .....T.....G.....A.....T.....T.....C.....
SVA_PA_8 .....G..G.....A.....T.....A.....T.....C.....
SVA_PA_9 .....G.....A.....T.....T.....C.....
SVA_PA_10 .....C.....G.....A.....T.....T.....C.....
SVA_PA_11 .....G.....A.....T.....T.....C.....
SVA_PA_12 .....T.....

SVA_PA_1 TCTCCACTATTATCTATGACCTTGCACATCCCCCTCTCCGAGAAAACCCCAAGAAATGATCAA
SVA_PA_2 .....T.....
SVA_PA_3 .....T.....
SVA_PA_4 .....T.....
SVA_PA_5 .....T.....
SVA_PA_6 .....C.....T.....
SVA_PA_7 .....T.....
SVA_PA_8 .....C..T.....
SVA_PA_9 .....C..T.....C.....
SVA_PA_10 .....C..T.....C.....
SVA_PA_11 .....C.....C..T.....C.....
SVA_PA_12 .....T.....

```

B

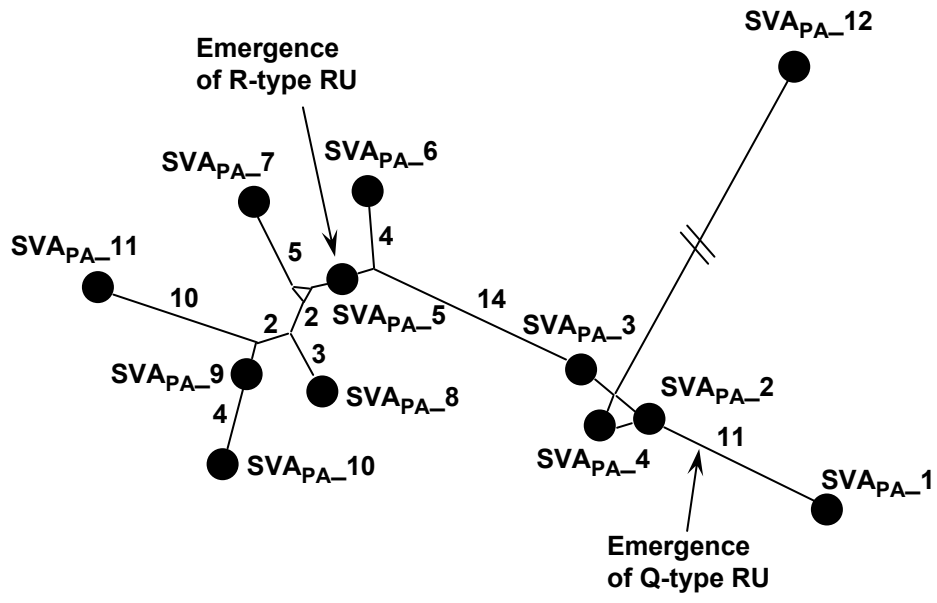





*M.mullatta*  
 CTTCCTCCCTCTTTGCAAAAGACATAGAGGATTGAGTTATTATCAATTGATCCACAGTCCCTCTCTCAATTTTTCATTTCCACCCCT-ATTTCTATTCCCGTCTTCCCAATGCAACCTTCCCTAATA  
*N. leucogenys*  
 .....T.....A.....T.....CC.....T.....G.....  
 LAVA\_A1 .....T.....A.....C.....G.....  
 LAVA\_A2 .....A.....T.....G.....  
 LAVA\_B1A .....A.....A.....G.....  
 LAVA\_B1B .....A.....A.....G.....  
 LAVA\_B1R .....A.....A.....G.....  
 LAVA\_B1E .....A.....A.....G.....  
 LAVA\_B1M .....A.....A.....G.....  
 LAVA\_B2R2 .....A.....A.....G.....  
 LAVA\_B2R1 .....A.....A.....G.....  
 LAVA\_B2A .....A.....A.....G.....  
 LAVA\_B2C .....A.....A.....G.....  
 LAVA\_B2B .....A.....A.....G.....  
 LAVA\_B2E .....A.....A.....G.....  
 LAVA\_B1G .....A.....A.....G.....  
 LAVA\_B1F .....A.....A.....G.....  
 LAVA\_B1L .....A.....A.....G.....  
 LAVA\_C1 .....T.A.....T.....G.....  
 LAVA\_C2 .....C.....T.A.....T.....G.....  
 LAVA\_C3 .....C.....T.A.....T.....G.....  
 LAVA\_C4 .....C.....T.A.....T.....G.....  
 LAVA\_D .....C.....T.A.....T.....G.....  
 LAVA\_E .....C.....T.A.....T.....G.....  
 LAVA\_F .....C.....T.A.....T.....G.....  
 LAVA\_F0 .....C.....T.A.....T.....G.....

TGTTTGATGFGCACTTTTGTGTTGATGCTTTTGTAGAAAATGTTTATGTTTT-GTGTG  
*M.mullatta*  
 .....A.....T.....C.....  
 LAVA\_A1 .....T.....  
 LAVA\_A2 .....T.....  
 LAVA\_B1A .....T.....  
 LAVA\_B1B .....T.....  
 LAVA\_B1R .....T.....  
 LAVA\_B1E .....T.....  
 LAVA\_B1M .....T.....  
 LAVA\_B2R2 .....T.....  
 LAVA\_B2R1 .....T.....  
 LAVA\_B2A .....T.....  
 LAVA\_B2C .....C.....  
 LAVA\_B2B .....T.....  
 LAVA\_B2E .....A.A.....  
 LAVA\_B1G .....A.....T.....  
 LAVA\_B1F .....AC.....T.....  
 LAVA\_B1L .....AC.....T.....  
 LAVA\_C1 .....AC.....T.....  
 LAVA\_C2 .....AC.....T.....  
 LAVA\_C3 .....AC.....T.....  
 LAVA\_C4 .....AC.....T.....  
 LAVA\_D .....AC.....T.....  
 LAVA\_E .....AC.....T.....  
 LAVA\_F .....AC.....T.....  
 LAVA\_F0 .....AC.....T.....

*M.mullatta*  
 .....T.....A.....T.....CC.....T.....G.....  
*N. leucogenys*  
 .....T.....A.....C.....G.....  
 LAVA\_A1 .....T.....A.....G.....  
 LAVA\_A2 .....A.....T.....G.....  
 LAVA\_B1A .....A.....A.....G.....  
 LAVA\_B1B .....A.....A.....G.....  
 LAVA\_B1R .....A.....A.....G.....  
 LAVA\_B1E .....A.....A.....G.....  
 LAVA\_B1M .....A.....A.....G.....  
 LAVA\_B2R2 .....A.....A.....G.....  
 LAVA\_B2R1 .....A.....A.....G.....  
 LAVA\_B2A .....A.....A.....G.....  
 LAVA\_B2C .....A.....A.....G.....  
 LAVA\_B2B .....A.....A.....G.....  
 LAVA\_B2E .....A.....A.....G.....  
 LAVA\_B1G .....A.....A.....G.....  
 LAVA\_B1F .....A.....A.....G.....  
 LAVA\_B1L .....A.....A.....G.....  
 LAVA\_C1 .....T.A.....T.....G.....  
 LAVA\_C2 .....C.....T.A.....T.....G.....  
 LAVA\_C3 .....C.....T.A.....T.....G.....  
 LAVA\_C4 .....C.....T.A.....T.....G.....  
 LAVA\_D .....C.....T.A.....T.....G.....  
 LAVA\_E .....C.....T.A.....T.....G.....  
 LAVA\_F .....C.....T.A.....T.....G.....  
 LAVA\_F0 .....C.....T.A.....T.....G.....

TGTTTGATGFGCACTTTTGTGTTGATGCTTTTGTAGAAAATGTTTATGTTTT-GTGTG  
*M.mullatta*  
 .....A.....T.....C.....  
 LAVA\_A1 .....T.....  
 LAVA\_A2 .....T.....  
 LAVA\_B1A .....T.....  
 LAVA\_B1B .....T.....  
 LAVA\_B1R .....T.....  
 LAVA\_B1E .....T.....  
 LAVA\_B1M .....T.....  
 LAVA\_B2R2 .....T.....  
 LAVA\_B2R1 .....T.....  
 LAVA\_B2A .....T.....  
 LAVA\_B2C .....C.....  
 LAVA\_B2B .....T.....  
 LAVA\_B2E .....A.A.....  
 LAVA\_B1G .....A.....T.....  
 LAVA\_B1F .....AC.....T.....  
 LAVA\_B1L .....AC.....T.....  
 LAVA\_C1 .....AC.....T.....  
 LAVA\_C2 .....AC.....T.....  
 LAVA\_C3 .....AC.....T.....  
 LAVA\_C4 .....AC.....T.....  
 LAVA\_D .....AC.....T.....  
 LAVA\_E .....AC.....T.....  
 LAVA\_F .....AC.....T.....  
 LAVA\_F0 .....AC.....T.....

**Figure S5** Alignments of the VNTR regions of orthologous SVA\_D elements in human (HSA) and chimpanzee (PTR). Microhomologies flanking breakpoints are highlighted in yellow. Repeat unit (RU) types are annotated on top of the sequences. Variant RUs in chimpanzee are indicated in red below the respective RU. Changes in the repeat unit patterns are given below the respective alignment.

|         |                                                                                                                |  |                         |
|---------|----------------------------------------------------------------------------------------------------------------|--|-------------------------|
|         | <b>A</b>                                                                                                       |  | <b>B</b>                |
| D11_HSA | CCTCTGCCTGGCCGCCACCCCATCTGGGAAGTGAGGAGCG-TCTCTGCCTGGCCGCCCATCGTCTGGGATGTGAGGAGCC-                              |  |                         |
| D11_PTR | CCTCTGCCC GGCCGCCACCCCTGTCTGCGAAGTGAGGAGCA-TCTCTGCCTGGCCGCCCATCGTCTGGGATGTGAGGAGCC-                            |  |                         |
|         | <b>C</b>                                                                                                       |  | <b>A</b>                |
| D11_HSA | CCTCTGCCTGGCTGCCAGTCTGGAAAGTGAGGAGCG-TCTCTGCCCGGCCGCCATCCCATCTAGGAAGTGAGGAGCG-                                 |  |                         |
| D11_PTR | CCTCTGCCTGGCTGCCAGTCTGGAAAGTGAGGAGCG-TCTCTGCCTGGCTGCCATCCCATCTAGGAAGTGAGGAGCG-                                 |  |                         |
|         | <b>A</b>                                                                                                       |  | <b>B'</b>               |
| D11_HSA | CCTCTTCCCAGCCGCCATCCCATCGAGGAAGTGAGGAGCG-TCTCTGCCCGACCACCCATCGTCTGAGATGTGAGGAGCG-                              |  |                         |
| D11_PTR | CCTCTTCCCAGCCGCCATCCCATCGAGGAAGTGAGGAGCG-TCTCTGCCAGCCACCCATCATCTGAGATGTGAGGAGCG-                               |  |                         |
|         | <b>C</b>                                                                                                       |  | <b>A</b>                |
| D11_HSA | CCTCTGCCCCGCCGCCCGTCTGGGATGTGAGGAGCG-CCTCTGCCTGGCCGCGACCCCGTCTGGGAGGTGAGGAGCG-                                 |  |                         |
| D11_PTR | CCTCTGCCTGCCGCCCGTCTGGGATGTGAGGAGCG- <b>CTCTGCC</b> -----                                                      |  |                         |
|         | <b>C</b>                                                                                                       |  | <b>A</b>                |
| D11_HSA | <b>CTCTGCC</b> CGGCCGCCCGTCTGAGAAGTGAGGAGAC-CCTCTGCCCGGCAGCCGCCCGTCTGGGAAGTGAGGAGCG-                           |  |                         |
| D11_PTR | -----CGGCCGCCCGTCTGAGAAGTGAGGAGAC-CCTCTGCCCGGCAGCCGCCCGTCTGGGAAGTGAGGAGCA-                                     |  |                         |
|         | <b>F</b>                                                                                                       |  | <b>K</b>                |
| D11_HSA | TCTCCGCCGGCAGCCACCCCGTCCGGGAGGGAGGTGGGG <b>GTCAGC</b> - <b>CCCCCGCCGGCCAGCCGCCCGTCCGGGAGGGAGG</b> TGCGGGTCAGC- |  |                         |
| D11_PTR | TCTCCGCCAGCAGCCACCCCGTCCGGGAGGGAGGTGGGG-----                                                                   |  |                         |
|         | <b>K</b>                                                                                                       |  | <b>K</b>                |
| D11_HSA | CCCCGCCTGGCCAGCCGCCCGTCCGGGAGGGAGGGGGGTCAGC-CCCCCGCCGGCCAGCCGCCCGTCCAGGAGGGAGGTGGGGGTCAGC-                     |  |                         |
| D11_PTR | -----                                                                                                          |  | <b>GTCAGC</b> -----     |
|         | <b>K</b>                                                                                                       |  | <b>K</b>                |
| D11_HSA | CCCCCGCCGGCCAGCCGCCCGTCCGGGAGGGAGGT <b>GGGGGTCAGC</b> - <b>CCCC</b> TGCCCGCCAGCCGCCCGTCCGGGAGGGAGGTGGGGGTCAGC- |  |                         |
| D11_PTR | <b>CCCCCGCCGGCCAGCCGCCCGTCCGGGAGGGAGG</b> TGG-----                                                             |  | <b>GGGGGTCAGC</b> ----- |
|         | <b>G</b>                                                                                                       |  | <b>C'</b>               |
| D11_HSA | CCCCCGCCGGCCAGCCGCCCGTCCAGAAGGTGAGGGGCG-CCTCTGCCCGGCCGCCCTACTGGGAAGTGAGGAGCC-                                  |  |                         |
| D11_PTR | <b>CCCC</b> CACCCGGCCAGCCGCCCGTCCGGA-GGTGAGGGGCG-CCTCTGCCCGGCCGCCCTACTGGGAAGTGAGGAGCC-                         |  |                         |
|         | <b>T</b>                                                                                                       |  |                         |
| D11_HSA | CCTCTGCCTGGCCACCACCCCGTCTGGGAGGTG                                                                              |  |                         |
| D11_PTR | CCTCTGCCCGGCCACCACCCCGTCTGGGAGGTG                                                                              |  |                         |

**CAC** ↔ **C-C**

**FKKKKKG** ↔ **F---K-G**

Figure S5 – continued

D12\_HSA CCTCTGCCCCGCCACCACCCCGTCTGGGAAGTGAGGAGCG-TCTTGCCCTGGCCGACCATCGTCTGGGATGTGAGGAGCC-  
D12\_PTR CCTCTGCCCCGCCACCACCCCGTCTGGGAAGTGAGGAGCG-TCTTGCCCTGGCCGACCATCGTCTGGGATGTGAGGAGCC-

**A** **B**

D12\_HSA CCTCTGCCTGGCTGCCAGTCTGGAAAGTGAGGAGCG-TCTTGCCCGGCCCATCCCATCTAGGAAGTGAGGAGCG-  
D12\_PTR CCTCTGCCTGGCTGCCAGTCTGGAAAGTGAGGAGCG-TCTTGCCCTGGCCGACCATCCCATCTAGGAAGTGAGGAGCG-

**C** **A**

D12\_HSA TCTCTGCCCCGCCACCCATCGTCTGAGATGTGGGGAGCG-CCTTGCCCCGCCGCCCGTCTGGAATGTGAGGAGCG-  
D12\_PTR TCTCTGCCCCGCCACCCATCGTCTGAGATGTGGGGAGCG-CCTTGCCCCGCCGCCCGTCTGGAATGTGAGGAGCG-

**B'** **C**

D12\_HSA CCTCTGCCCCGCCCAACCCGTCTGGGAGGTGAGGAGCG-TCTTGCCCGGCCGCCCGTCTGAGAAGTGAGGAGAC-  
D12\_PTR CCTCTGCCCCGCCCAACCCGTCTGGGAGGTGAGGAGCG-TCTTGCCCGGCCGCCCGTCTGGGAAGTGAGGAGAC-

**A** **C**

D12\_HSA CCTCTGCCTGGCAACCCCGTCTGAGAAGTGAGGAACC-CCTCCACCCGGCAGCCACCCCGTCTGGGAAGTGAGGAGCG-  
D12\_PTR CCTCTGCCTGGCAACCCCGTCTGAGAAGTGAGGAGCC-CCTCCGCCCCGCAGCCACCCCGTCTGGGAAGTGAGGAGCG-

**A** **A**

D12\_HSA TCTCCGCCCGGCAGCCACCCCGGGAGGGAGGTG-----  
D12\_PTR TCTCCGCCCGGCAGCCCGCCCGTCCGGGAGGGAGGTG**GGGGT**CAG-CCCCGCCAGGCCAGCCGCCCATCCGGGAGGGAGGTGGGGGGT**CAGC**-

**?** **K**

D12\_HSA -----A**GGGGT**G-CCTTGCCCGGCCGCCCTACTGGGAAGTGAGGAGCC-  
D12\_PTR CCCCCGCCCGGCCAGCCGCCCGTCCGGGAGGTGAGGGGGCG-CCTTGCCCGGCCGCCCTACTGGGAAGTGAGGAGCC-

**G** **C'**

D12\_HSA CCTCTGCCTGGCCACCACCCCGTCTGGGAGGTG  
D12\_PTR CCTCTGCCCGACCACCACCCCGTCTGGGAGGTG

**A?--C' ↔ A?KGC'**

D13\_HSA CCTCTGCCCCGCCACGCCGTCTGGGAAGTGAGGAGCG-TCTTGCCCGGCCGCCCATCATCTGGGATGTGAGGAGCC-  
D13\_PTR CCTCTGCATGGCCGCCACCCCGTCTGGGAAGTGAGGAGCG-TCTTGCCCTGGCCGCCCATCGTCTGGGACGTGAGGAGCC-

**A** **B**

D13\_HSA CCTCTGCCTGGCTGCCAGTCTGGAAAGTGAGGAGCG-TCTTGCCCGGCC**GCGATCCCA**TCTAGGAAGTGAGGAGCG-  
D13\_PTR CCTCTGCCTGGCTGCCAGTCTGGAAAGTGAGGAGCG-TCTTGCCCGGCC-----

**C** **A**

D13\_HSA CCTCTTCCCGGCTGCCATCCCATCTAGGAAGTGAGGAGCG-TCTTGCCCGGCCGCCCATCGTCTGATATGTGGGGAGCG-  
D13\_PTR -----**GCCATCCCA**CCTGGGAAGTGAGGAGCG-TCTTGCCCGGCCGCCCATCGTCTGAGATGTGGGGAGCG-

**A** **B'**

D13\_HSA **CCTCTGCCG**-----CGCCGCCCGTCTGGGATGTGAGGAGCG-  
D13\_PTR CCTCTGCCCGGCCGCGACCCCATCTGGGATGTGAGGAGCA-T**CTCTGCCG**AGCCGCCCGTCTGAGAAGTGAGGAGAC-

**A** **C**

D13\_HSA CCTCTGCCCA---GCCGCCCGTCTGAGAAGTGAAGAG-CCCCGCCCGGCCAGCCGCCCATCTGGGAAGTGAGGAGCG-  
D13\_PTR CCTCCGCCAGCAGCCGCCCGTCTGAGAAGTGAGGAG-CCCCCTGCCAGCAGCTGCCCGTCTGGGAAGTGAGGAGCG-

**C** **A**

D13\_HSA TCTCCGCCCGGCAGCCAACCCGTCTGGGAGGGAGGTGGGGGGT**CAG**-CCCCACGCGGCCGCCCGCCCGTCCGAGAAGTGGGGGGCG-  
D13\_PTR TCTCCGCCCGGCAGCCACCCACCCGGGAGGGAGGTGGGGG-T**CAG**-CCCCGCCCGGCCAGCCACCCCATCTGGGAGGTGGGGGGCG-

**A** **A** **G**

D13\_HSA CCTCTGCCCGGCCGCCCTACTGGGAAGTGAGGAGCC-CCTTGCCCGGCCACCACCCCGTCTGGGAGGTG  
D13\_PTR CCTCTGCCCGGCCGCCCTACTGGGAAGTGAGGAGCC-CCTTGCCCGGCCACCACCCCATCTGGGAGGTG

**C'** **T**

**CAAB' ↔ C-AB'**

**B'-C ↔ B'AC**

**C ↔ A**

**Figure S5 – continued**

D14\_HSA CCTCTGCCTGGCCGCCATCCCGTCTGGGAAGTGAGGAGCG-TCTCTGCCTGGCCGCCCATCGTCTGGGATGTGAGGAGCC-  
D14\_PTR CCTCTGCCCGGCCGCCACCCCGTCTGGGAAGTGAGGAGCG-TCTCTGCCTGGCCGCCCATCGTCTGGGATGTGAGGAGCC-

D14\_HSA CCTCTGCCTGGCTGCCAGTCTGGAAAGTGAGGAGCG-TCTCTGCCCGGCCGCCATCCC-----  
D14\_PTR CCTCTGCCTGGCTGCCAGTCTGGAAAGTGAGGAGCG-TCTCTGCCCGGCCGCCATCCC**ATCTAGGAAGTGAG**AAGCG-

D14\_HSA -----**ATCTAGGAAGTGAG**GAGCG-TCTCTGCCCGGCCGCCATCGTCTGA-----  
D14\_PTR CCTCTTCTGGCCGCCATCACATCTAGGAAGTGAGGAGCG-TCTCTGCCCGGCCGCCATCGTCTGA**GATGTG**GGGAGCG-

D14\_HSA -----**GATGTG**AGGAGCG-CCTCTGCCCGGCCGCCACCCCGTCTGGGAGGTGAAGAGCG-  
D14\_PTR CCTCTGCCCGGCCGCCCGTCTGGGATGTGAGGAGCG-CCTCTGCCCGGCCCGTGACCCCGTCTGGGAGGTGAAGAGCA-

D14\_HSA TCTCTGCCAGCCGCCCGTCTGAGAAGTGAGGAGAC-CCTCTGCCTGGCAACCACCCCGTCTGAGAACTGAGGAGCC-  
D14\_PTR TCTCTGCCAGCCGCCCGTCTGAGAAGTGAGGAGAC-CCTCTGCCTGGCAACCACCCCATCTGAGAACTGAGGAGCC-

D14\_HSA CCTCTGCCCGGCAGCCGCCCGTCTGAGAAGTGAGGAGCC-TCTCCGCCGGCAACCACCCCGTCTGGGAAGTGAGGAGCC-  
D14\_PTR CCTCTGCCCGGCAGCCGCCCGTCTGAGAAGTGAGGAGCC-TCTCCGCCGGCAACCACCCCGTCCGGGAAGTGAGGAGTG-

D14\_HSA **CCTCTG**-----CCCGGCCAGCCGCCCGTCCGGGAGGTGAGGGGCG-  
D14\_PTR TCTCCGCCCGGCAGCCGCCCGTCCGGGAGGGAGGTGGGGGGGGTTCAGC-**CCCG**CCCGGCCAGCCGCCCGTCCGGGAGGTGAGGGGCG-

D14\_HSA CCTCTGCCCGGCCGCCCTACTGGGAAGTGAGGAGCC-CCTCTGCCAGCCAGCCGCCCGTCCAGGAGGGAGGTGGGGGGTTCAGC-  
D14\_PTR CCTCTGCCCGGCCGCCCTACTGGGAAGTGAGGAGCC-CCTCTGCCCGGCCAGCCACCCGTCCAGGAGGGAGGTGGGGGGTTCAGC-

D14\_HSA CCCCTGCCCGGCCAGCCGCCCGTCCGGGAGGGAGGTGGGGGGTTCAGC-CCCCGCCAGCCAGCCGCCCGTCCGGGAGGGAGGTGG-----  
D14\_PTR CCACCGTCCAGCCAGCCGCCCGTCCGGGAGGGAGGTGGGGGGTTCAGC-CCCCGTCCGGCCAGCCGCCCGTCCGGGAGGGAGGT**GGGGGGTTCAGC**-

D14\_HSA -----**GGGGGGTTCAGC**-CCCCGCCAGCCAGCCGCCCGTCCGGGAGGTGAGGGGTG-  
D14\_PTR CCCAGCCCGGCCAGCTGCCCGTCCGGGAGGGAGGTGGGGGGTTCAGC--CCCCGCCAGCCAGCCGCCCGTCCGGGAGGTGAGGGGCG-

D14\_HSA CCTCTGCCCGGCCACCCCTACTGGGAAGTGAGGAGCC-CCTCTGCCTGGCCACCACCCCGTCTGGGAGGTG  
D14\_PTR CCTCTGCCCGGCCACCCCTACTGGGAAGTGAGGAGCC-CCTCTGCCTGGCCACCACCCCGTCTGGGAGGTG

**CA-B' ↔ CAAB'**  
**B'-A ↔ B'CA**  
**A-G ↔ AFG**  
**K-G ↔ KKG**

**Figure S5 – continued**

D15\_HSA CCTCTGCCCGCCGCCGCCCTGTCTGGGAAGTGAGGGGCG-TCTCTGCCT**GGCCGCC**CATCGTCTGGGATGTGAGGAGCC-  
 D15\_PTR CCTCTGCCCGCCGCCGCCCTGTCTGGGAAGTGAGGGGCG-TCTCTGCCT-----

D15\_HSA CCTCTGCCTGGCTGCCAGTCTGGAAAGTGAGGAGCG-TCTCTGCCCGGCCACCATCCTGTCTAGGAAGTGAGAAGCG-  
 D15\_PTR -----

D15\_HSA TCTCTGCCTGGCCGCCATTGTCTGGGATGTGAGGAGCC-CCTCTGCCTGGCTGCCAGTCTGGAAAGTGAGGAGCG-  
 D15\_PTR -----

D15\_HSA TCTCTGCCCGCCGCCCATCCCATCTAGGAAGTGACGAGCG-TCTCTCCCGCCGCCATCCCATCTAGGAAGTGAAGAGCG-  
 D15\_PTR -----**GGCCGCC**ATCCCATCTAGGAAGTGACGAGCG-TCTCTCCCGCCGCCATCCCATCTAGGAAGTGAGGCGCG-

D15\_HSA TCTCTGCCCGGCTGCCATCGTCTGAGATGTGGGAGAG-CCTCTGCCCCGCCGCCCGTCTGGGATGTGAGGAGCG-  
 D15\_PTR TCTCTGCCCGCCGCCCATGTCTGAGATGTGGGAGAG-CCTCTGCCCCGCCACCCTCTGGGATGTGAGGAGCG-

D15\_HSA CCTCTGCCCGCCCGACCCCGTCTGGGAGGTGAGGAGCG-TCTCTGCCTGGCCGCC-----  
 D15\_PTR CCTCTGCCCGCCCGACCCCGTCTGGGAGGTGAGGAGCG-TCTCTGCCTGGCCGCC**GTCTGAGAAGTGAGGAG**AC-

D15\_HSA -----**GTCTGAGAAGTGAGGAG**CC-CCTCCACCCGGCAGCCGCCCGCCGGGAGGGGGTGGGGGGGGTCAGC-  
 D15\_PTR CCTCCGCCCGCAGCCCGTCTGAGATGTGAGGAGCG-CCTCCGCCCGCAGCCGCCACCTGGGAGTGGGGTGGGGGG--TCAGC-

D15\_HSA **CCCCCGCCCGCCAGCC**A-----CCCTGTCTGGGAGGGAGGTGTGGGGGGGGTCAGC-  
 D15\_PTR CCCCCGCCCGCCAGCCGCCCGTCCGGGAGGGAGGTGTGGGGAGTCAGCC**CCCCCGCCCGCCAGCC**GCCCCGTCCAGGAGGGAGGTGTGGGGGGGGTCATC-

D15\_HSA CCCCTGCCCGCCAGCCGCCCGTCCGGGAGGGAGGTGTGGGGGGGGTCAGC-CGTCCCCTCCGGGAGGTGAGGGGCG-  
 D15\_PTR CCCCCGCCCGCCAGC-----CGTCCCATCCGGGAGGTGAGGGGCG-

D15\_HSA CCTCTGCCCGCCGCCCTACTGGGAAGTGAGGAGC-CCCTCTGCCAGCCACCACCCCTCTGGGAGGTG  
 D15\_PTR CCTCTGCCCGCCGCCCTACTGGGAAGTGAGGAGC-CCCTCTGCCCGGCCACCACCCCTCTGGGAGGTG

**ABCABCA ↔ A-----A**  
**AC-F ↔ ACAF**  
**F-KKG (Δ) C' ↔ FKKK (Δ) G (Δ) C'**

**Figure S5 – continued**

**A** **B**  
D16\_HSA TCTCCGCCCGGCTGCCACCCCATCTGGGAAGTGAGGAGCA-TCTCTGCCTGGCCGCCCATCGTCTGGGATGTGAGGAGCC-  
D16\_PTR CCTCCACCCGGCTGCCACCCCATCTGGGAAGTGAGGAGTG-TCTCTGCCTGGCCGCCCATCATCTGGGATGTGAGGAGCC-

**C** **A**  
D16\_HSA CCTCTGCCTGGCTGCCAGTCTGGGAAGTGAGGAGCG-CCTCTCCCGCCGCCATCCCATCTAGGAAGTGAGGAGCG-  
D16\_PTR CCTCTGCCTGGCTGCCAGTCTGGGAAGTGAGGAGCG-CCTCTCCCGCCGCCATCCCATCTAGGAAGTGAGGAGCA-

**B'** **C**  
D16\_HSA TCTCTGCCCA**GCCGCC**ATCGTCTGAGATGTGGGGAGCG-CCTCTGCCCCGCCGCCCGTCTGGGATGTGAGGAGCG-  
D16\_PTR TCTCTGCCCA-----**GCCGCC**CATCTGGGATGTGAGGAGCA-

**A** **C**  
D16\_HSA CCTCTGCCCGGCCGACCCCTGTCTGGGAGGTGAGGAGCG-TCTCTGCCTGGCCACCCTGTCTGAGAAGTGAGGAGCC-  
D16\_PTR CCTCTGCCCGGCCGACCCCGTCTGGGAGGTGAGGAGCG-TCTCTGCCCGGCCACCCTGTCTGAGAAGTGAGGAGCC-

**A**  
D16\_HSA CCTCCGCCCGGCAGCCACCCCATCTGAGAAGTG-----**AGGAGCA**-  
D16\_PTR CCTCCACCCGGCAGCCACCCCGTCTGAGAAGTG**AGGAGC**-CCTCCGCCCGGCAGCCATCCCATCTGGGAAGTAAGGAGCA-

**A** **A**  
**F** **K**  
D16\_HSA TCTCCGCCCGGCAGCCACCCCGTCCGGGAGGGAGGTGGGGGTCTAG-CCCCACCCGGCCAGCCGCCCGTCCGGGAGGGAGGTGGGGGTCTAG-  
D16\_PTR TCTCCACCTGGCAGCCACCCCGTCCGGGAGGGAGGTGGGGGTCTAG-CCCCACCCAGCCAGCCGCCCGTCCGGGAGGGAGGTGGGGGTCTAG-

**G** **C'**  
D16\_HSA CCTCCGCCCGGCCAGCCGCCCGTCCGGGAGGTGGGGGGCG-CCTCTGCCCGGCCGCCCTTCTGGGAAGTGAGGAGCC-  
D16\_PTR CCTCCGCCCGGCCAGCCACCCCGTCCGGGAGGTGGGGGGCG-CCTCTGCCTGGCGGCCCTTCTGGGAAGTGAGGAGCC-

**T**  
D16\_HSA CCTCTGCCCGGCCACCACCCCGTCTGGGAGGTG  
D16\_PTR CCTCTGCCCGGCCACCACCCCGTCTGGGAGGTG

**AB' C ↔ A-C**

**A-F ↔ AAF**

**A** **A**  
D17\_HSA CCTCTGCCTGGCCGCCATCCCATCTAGGAAGTGAGGAGCA-CCTCTCCCGCCGCCATCCCATCTAGGAAGTGAGGAGCG-  
D17\_PTR CCTCTGCCTGGCCGCCATCCCATCTAGGAAGTGAGGAGCA-CCTCTCCCGCCGCCATCCCATCTAGGAAGTGAGGAGCG-

**B'** **C**  
D17\_HSA TCTCTGCCAGCCGCCATCGTCTGAGATGTGGGGAGCG-CCTCTGCCCCGCTGCCCGTCTGGGATGTGAGGAGCG-  
D17\_PTR TCTCTGCCAACCGCCATCGTCTGAGATGTGGGGAGCG-CCTCTGCCCCACTGTCTGTCTGGGATGTGAGGAGCG-

**A** **C**  
D17\_HSA CCTCTGCCCGGCCACAACCCCGTCTGGGAGGTGAGGAGCA-TCTCTGCCCGGCCGCCCA**TCTGAGAAGTGAGGAGAC**-  
D17\_PTR CCTCTGCCCGGCCACAACCCCGTCTGGGAGGTGAGGAGCG-TCTCTGCCCGGCTGCCCATCTGAGAAGTGAGGAGAC-

**CCTCTGCC**  
D17\_HSA **CCTCTGCC**-----  
D17\_PTR CCTCCGCCAGCAGCCGCCCGTCTGAGAAGTGAGGAGAC-CCTCCGCCCGGCAGCCGCCCGTCTGAGAAGTGAGGAGAC-

**A** **A**  
**A** **F**  
D17\_HSA -----GGCAGCTGCCCGTCTGAGAAGTGAGGAGCC-  
D17\_PTR CCTCCGCCCGGCAGCCGCCCG**TCTGAGAAGTGAGGAGAC-CCTCCGCC**TGGCAGCTGCCCATCTGAGAAGTGAGGAGCC-

**A** **F**  
D17\_HSA CCTCTGCCCGGCCAGCCACCCCGTCTGGGAAGTGAGGAGCG-TCTCCGCCAGCAGCCACCCCGTCCGGGAGGGAGGTGGGGGTCTAG-  
D17\_PTR CCTCTGCCCGGCCAGCCACCCCGTCTGGGAAGTGAGGAGCG-TCTCCGCCCGGCAGCCACCCCGTCCGGGAGG-AGGTGGGGGTCTAG-

**G** **K** **K**  
D17\_HSA CCCCCGCTGGCCAGCTGCCCA**TCTGGGAGGT**-----  
D17\_PTR CCCCCGCTGGCCAGCCGCCCATCTGGGAGGGAGGTGGGGGTCTAG-TCCCCACCCGGCCAGCCGCCCGTCCGGGAGGGAGGTGGGGGTCTAG-

**C'** **K**  
D17\_HSA -----GGGGGGCG-CCTCTGCCCGGCCGCCCTTCTGGGAAGTGAGGAGCC-  
D17\_PTR CACCCGCCCGGCCAGCCGCCCG**TCTGGG****GGT**GGGGGGCG-CCTCTGTCCGGCCGCCCTTCTGGGAAGTGAGGAGCC-

**G** **C'**  
**T**  
D17\_HSA CCTCTGCCAGCCACCACCCCGTCTGGGAGGTG  
D17\_PTR CCTCTGCCCGGCCACCACCCCGTCTGGGAGGTG

**C---AAF ↔ CAAAAAF**

**FG--C' ↔ FKKGC'**

**Figure S5 – continued**

**A** **B**  
D18\_HSA CCTCTGCCCCGGCCGCCACCCCGTCTGGGAAGTGAGGAGCG-TCTCTGCCTGGCTGCCCATCGTCTGGGATGTGAGGAGCC-  
D18\_PTR CCTCTGCCCCGGCCGCCACCCCGTCTGGGAAGTGAGGAGCG-TCTCTGCCTGGCTGCCCATCGTCTGGGATGTGAGGAGCC-

**C** **A**  
D18\_HSA CCTCTGCCTGGCTGCCAGTCTGGAAAGTGAGGAGCG-TCTCTGCCCGGCCGCCATCCCATCTAGGAAA**TGAGGAGCG-**  
D18\_PTR CCTCTGCCTGGCTACCCAGTCTGGAAAG**TGAGGAGCG-TCTCTGCCCGGCCGCC**-----

**B'** **C**  
D18\_HSA **TCTCTGCCCGGCCGCC**CATCGTCTGAGATGTGGGAAGCG-CCTCTGCCCGGCCGCCCGTCTGGGATGTGATAAGCG-  
D18\_PTR -----CATCGTCTGAGATGTGGGAAGCG-CCTCTGCCCGGCCGCCCGTCTGGGATCTGAGGAGCG-

**A** **C**  
D18\_HSA CCTCTGCCCCGGCCGCGA-----**CCCCGTCTG**AGAAGTGAGGAGAC-  
D18\_PTR CCTCTGCCCCGGCCGCGA**CCCCGTCTG**GAGGAGTGAGGAGCG-TCTCTGCCCGGCCGCCCGTCTGAGAAGTGAGGAGAC-

**A** **C**  
D18\_HSA CCTCTGCCTGGCAACCGCCCGTCTGAGAAGTGAGGAGTC-CCTCCGCCCGGCAGCCACCCCGTCTGAGAAGTGAGGAGCC-  
D18\_PTR CCTCTGCCTGGCAACCGTCTGAGAAGTGAGGAGTC-CCTCCGCCCGGCAGCCCGCCCGTCTGAGAAGTGAGGAGCC-

**A** **F**  
D18\_HSA CCTCCCTCCGTACGCCACCCCGTCTGGGAAGTGAGGAGCG-TCTCCACCCGGCAGCCACCCCGTCCGGGAGGGAGGTGGGGGGTTCAGC-  
D18\_PTR CCTCCCTCCGTACGCCACCCCGTCTGGGAAGTGAGGAGCG-TCTCCGCCAGCAGCCACCCCGTCCGGGAGGGAGGTGGGGGGTTCAGC-

**G** **C'**  
D18\_HSA CCTCCGCCCGGCCAGCC**GCCCCGTCCGGGAGG**TGCGGGGCG-CCTCTGCCCAACCGCCCTACTGGGAAGTGAGGAGCC-  
D18\_PTR CCCCCGCCCGGCCAGCC-----

**K** **G**  
D18\_HSA CCTCTGCCCCGGCCAGCTGCCCGTCCGGGAGGGAGGTGGGGGGGTTCAGC-CCCCGCCCGGCCAGCCCGCCCGTCCGGGAGGTGAGGGGTG-  
D18\_PTR -----**GCCCCGTCCGGGAGG**GAGGTGGGGGGGTTCAGC-CCCCGCCCGGCCAGCCCGCCCATCCGGGAGGTGAGGGGCG-

**C'** **T**  
D18\_HSA CCTCTGCCCGGCCGCTTACTGGGAAGTGAGGAGCC-CCTCTGCCCGGCCACCCCGTCTGGGAGGTG  
D18\_PTR CCTCTGCCCGGCCGCTTACTGGGAAGTGAGGAGCC-CCTCTGCCCGGCCACCCCGTCTGGGAGGTG

**CAB' ↔ C-B'**

**CA-A ↔ CACA**

**FGC' KG ↔ F--KG**

Figure S5 – continued

D19\_HSA CCTCTGCCCGGCCGCCACCCCGTCTGGGAAGTGAGGAGCG-TCTCTGCCCGGCCGCCCATCGTCTGGGATGTGAGGAGCC-  
 D19\_PTR CCTCTGCCCGGCCGCCACCCCGTCTGGGAAGTGAGGAGCG-TCTCTGCCCGGCCGCCCATCGTCTGGGAATGTGAGGAGCC-

D19\_HSA CCTCTGCCTGGCTGCCTAGTCTGGAAAGTGAGGAGGG-TCTCTGCCCGGCCGCCATCCCATCTAGGAAGTGAGGAGCG-  
 D19\_PTR CCTCTGCCTGGCTCCCTAGTCTGGAAAGTGAGGAGCG-TCTCTGCCCGGCCACCATCCCATCTAGGAAGTGAGGAGCG-

D19\_HSA CCTCTTCCCGGCCGCCATCCCATCTGGGAAGTGAGGAGCG-TCTCTGCCCGGCCACCATCGTCTGAGATGTGGGGAGCA-  
 D19\_PTR CCTCTTCCCGGCCGCCATCCCATCTGGGAAGTGAGGAGCG-TCTCTGCCCGGCCACCATCGTCTGAGATGTGGGGAGCA-

D19\_HSA CCTCTGCCTGCCGCCCCGTCCGGGATGTGAGGAGCG-TCTCTGCCCGGCCGCCCGTCTGAGAAGTGAGGAGAC-  
 D19\_PTR CCTCTGCCTGCCGCCCCGTCCGGGATGTGAGGAGCA-TCTCTGCCCGGCCACCACCCCGTCTGAGAAGTGAGGAGAC-

D19\_HSA CCTCTGCCTGGCAACCCGCTCTGAGAAGTGAGGAGCG-CCTCCGCCCGGCAGCCGCCCGTCTGAGAAGTGAGGAGCC-  
 D19\_PTR CCTCTGCCT--AACC GCCCGCTCTGAGAAGTGAGGAGCG-----

D19\_HSA CCTCCGCCCGCAGCACCACCCCGTCTGGGAAGTGAGGAGCG-TCTCTGCCCGGCAGCCGCCCGTCCGGGGGGAGGTGGGGGG-TCAGC-  
 D19\_PTR CCTCCGCCCGCAGCACCACCCCGTCTGGGAAGTGAGGAGCG-TCTCTGCCCGGCAGCCACCTCGTCCGGGAGGGAGGTGGGGGGTTCAGC-

D19\_HSA CCCCCGCCCGGCCAGCCGCCCGTCCGGGAGGTGAGGGGCG-CCTCTGCCCGGCCGCCCTACTGGGAAGTAAGGAGCC-  
 D19\_PTR CCCCCGCCCGGCCAGCCGCCCGTCCGGGAGGTGAGGGGTG-CCTCTGCCCGGCCACCCTACTGGGAAGTGAGGAGCC-

D19\_HSA CCTCTGCCCGGCCACCACCCCGTCTGGGAGGTG  
 D19\_PTR CCTCTGCCCGGCCACCACCCCGTCTGGGAGGTG

CAAA ↔ C-CA

D20\_HSA CCTCTGCCCGGCTGCCACCCCATCTGGGAAGTGAGGAGCG-TCTCTGCCTGGCCGCCATCGTCTGGGATGTGAGGAGCC-  
 D20\_PTR CCTCTGCCCGGTTGCCACCCCTGTCTGGGAAGTGAGGAACG-TCTCTGCCTGGCCACCATCATCTGGGATGTGAGGAGCC-

D20\_HSA CCTCTGCCTGGCTGCCAGTCTGGGAAGTAAGGAGCG-CCTCTTCCCCGCCCATCCCATCTAGGAAGTGAGGAGCG-  
 D20\_PTR CCTCTGCCTGGCTGCCAGTCTGGGAAGTAAGGAGCG-CCTCTTCCCCGCTGCCATCCCATCTAGGAAGTGAGGAGCG-

D20\_HSA TCTCTGCCCGGCCGCCATCCCTCTGAGATGTGGGGAGCA-CCTCTGCCCGGCCGCCCTTCTGGGATATGAGGAGCG-  
 D20\_PTR TCTCTGCCCGGCTGCCATCCCTCTGAGATGTGGGGAGCA-CCTCTGCCCGGCCGCCCGTCTGGGATATGAGGAGCG-

D20\_HSA TCTCTGCCTGGCCGCCCGTCTGAGAGGTGAGGAGCC-CCTCCGCCCGGCAGCCGCCCGTCTGAGAAGTGAGGAGGC-  
 D20\_PTR TCTCTGCCTGGCCACCAGTCTGAGAGGTGAGGAGCC-CCTCCGCCCGGCAGCCGCTCTGAGAGGTGAGGAGCC-

D20\_HSA CCTCCGCCCGGCAGCCGCCCGGCGGGAGGGAGGTGG-GGAGGTCAG-CCCCGCCCGGCCAGCCACCACCCGTCGGGAGGGAGGTGGGGTGGGGGGGGTTCAG-  
 D20\_PTR CCTCTGCCCGGCAGCCGCCCGGTCGGGAGGGAGATGGTGGGGTTCAG-CCCCGCCCTGGCCAGCCGCTGGTTCGGGAGGGAGGTGGGG-----GGGGTTCAG-

D20\_HSA CCCCCGCCCGGCCAGCCGCCCGGTCGGGAGGGGGGGTTCAG-----  
 D20\_PTR CCCCCGCTGGCCAGCCGCCCGGTCGGGAGGGAGGTGGGG-GTC-G-CCTCCGCCCGGCCAGCCGCTCCGTCGGGAGGTGGGGGGCG-

D20\_HSA CCCCTGCCCGGCCGCCCTTCTGGGAAGTGAGGAGCC-CCTCTGCCCGGCCACCACCCCGTCTGGGAGGTG  
 D20\_PTR CCTCTGCCCGGCCGCCCTTCTGGGAAGTGAGGAGCC-CCTCTGCCCGGCCACCACCCCGTCTGGGAGGTG

K?-C' ↔ K?GC'



**Figure S6** Alignments of the VNTR regions of *Nomascus leucogenys* LAVA elements that have amplified as parts of segmental duplications. Microhomologies belonging to the same breakpoints are highlighted in identical color. Repeat unit (RU) types are annotated on top of the sequences. Position information for the elements is provided in Additional file 3.

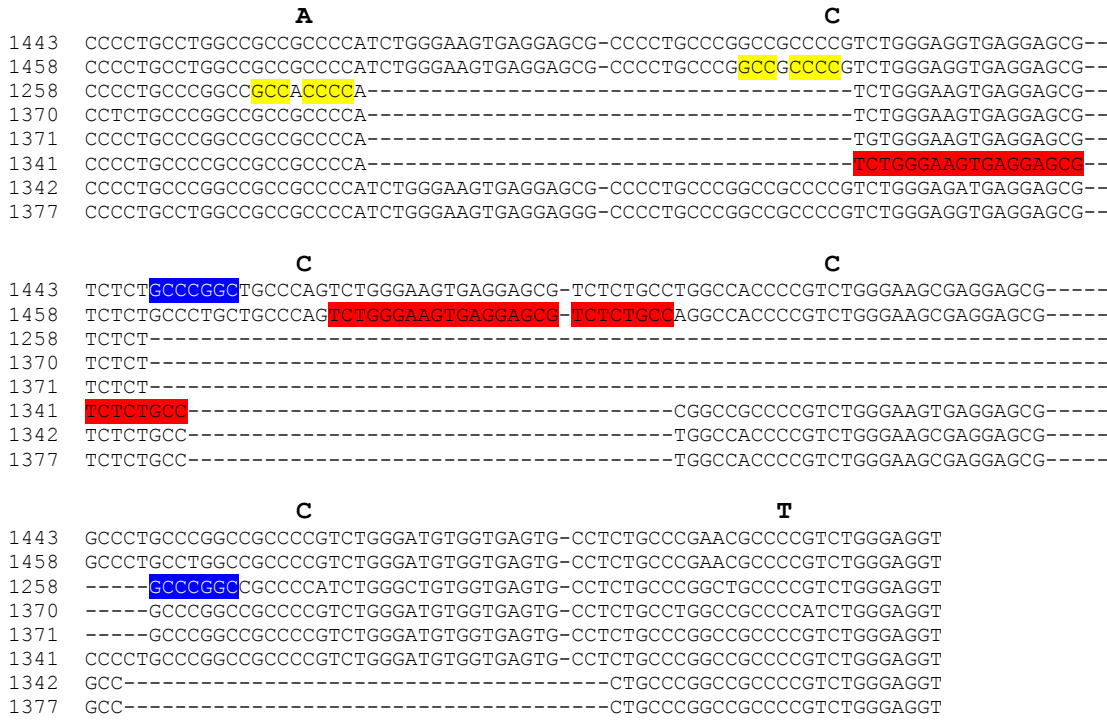



### 3' part

```
-----  
Reference  ATTTTTCATTTTCCCTCCCTTCTGATCCCTTTATCCCACTTTCCTTTTCTTCCCTTCCCTTCTCCCTTCTGAAATAGAGGATTGAGTTATTATCACCTGATCCACATAAAGTACCCTCTACCTTATTTTAACTCCACCCCCC  
Amplified  ATTTTTCATTTTCCCTCCCTTCTGATCCCTTTATCCCACTTTCCTTTTCTTCCCTTCCCTTCTCCCTTCTCCCTTCTGAAATAGAGGATTGAGTTATTATCACCTGATCCACATAAAGTACCCTCTACCTTATTTTAACTCCACCCCCC  
  
----->  
Reference  ATTTCTATCCCGACTTCCCATGTGTAACCTTCCCTAATAATGTTTGTATGTAATTTTGTAGAAAAATGTTTATTTGTTTGTGCAAAAAATAAATAA  
Amplified  ATTTCTATCCCGACTTCCCATGTGTAACCTTCCCTAATAATGTTTGTATGTAATTTTGTAGAAAAATGTTTATTTGTTTGTGCAAAAAATAAATAA - AAAAAAAGAGAAAAAGAG - AAAAAAAGGAAAAAGA  
  
Reference  AAAAAATATAGTTTAAATAACATATAAACACCATAGTATACTGAATTTATTAATACTCCCACTACAGATGCCAGTAAGCACTACAGGC  
Amplified  AAAAAATATAGTTTAAATAACATATAAACACCATAGTATACTGAATTTATTAATACTCCCACTACAGATGCCAGTAAGCACTACAGGC
```

**Figure S7 B Fine structure of the domain junctions in LAVA chimeras**

**L<sub>E</sub>L<sub>F</sub> 5': BstAPI-blunted/Ava-blunted**

LAVA\_E CGCCTGCCTTGGCTACCAGGGTGCTGGGATTGCAG cccctgcccggccaccgcccgcctctgggaggtggg  
 LELF 5' CGCCTGCCTTGGCTACCAGGGTGCTGGGATTGCAG **G**cccctgcccggccaccgcccgcctctgggaggtggg  
 LAVA\_F TGAGGCCGAGTGCTCTGCCCGCTCAGCCTCCCGA Gcccctgcccggccaccgcccgcctctgggaggtggg

**L<sub>F</sub>L<sub>E</sub> 5': SmaI/BstAPI-blunted**

LAVA\_F TGAGGCCGAGTGCTCTGCCCGCTCAGCCTCCCGA cccctgcccggccaccgcccgcctctgggaggtggg  
 LFLE 5' TGAGGCCGAGTGCTCTGCCCGCTCAGCCTCCCGA cccctgcccggccaccgcccgcctctgggaggtggg  
 LAVA\_E CGCCTGCCTTGGCTACCAGGGTGCTGGGATTGCAG cccctgcccggccaccgcccgcctctgggaggtggg

**L<sub>E</sub>L<sub>F</sub> 3': Accl-blunted/RsaI**

LAVA\_E aggagcgcttctgcccggccgctccgctctgggaggtCTACCACCGAGGCCAGAAGCAATGTAGGGGCTGGAC  
 LELF 3' aggagcgcttctgcccggccgctccgctctgggaggtCTACCATGGAGGCCAGAAGCAATGTAGGGGCTGGAC  
 LAVA\_F aggagcgcttctgcccggccgctccgctctgggaggtCTACCATGGAGGCCAGAAGCAATGTAGGGGCTGGAC

**L<sub>F</sub>L<sub>E</sub> 3': Accl-blunted/RsaI**

LAVA\_F aggagcgcttctgcccggccgctccgctctgggaggtCTACCATGGAGGCCAGAAGCAATGTAGGGGCTGGAC  
 LFLE 3' aggagcgcttctgcccggccgctccgctctgggaggtCTACCATGGAGGCCAGAAGCAATGTAGGGGCTGGAC  
 LAVA\_E aggagcgcttctgcccggccgctccgctctgggaggtCTACCACCGAGGCCAGAAGCAATGTAGGGGCTGGAC

**L<sub>E</sub>L<sub>F</sub>L<sub>E</sub>: 5' end - BstAPI-blunted/Ava-blunted; 3' end - Accl-blunted/RsaI**

LAVA\_E CGCCTGCCTTGGCTACCAGGGTGCTGGGATTGCAG cccctgcccggccaccgcccgcctctgggaggtggg  
 LELF 5' CGCCTGCCTTGGCTACCAGGGTGCTGGGATTGCAG **G**cccctgcccggccaccgcccgcctctgggaggtggg  
 LAVA\_F TGAGGCCGAGTGCTCTGCCCGCTCAGCCTCCCGA Gcccctgcccggccaccgcccgcctctgggaggtggg  
 LAVA\_F aggagcgcttctgcccggccgctccgctctgggaggtCTACCATGGAGGCCAGAAGCAATGTAGGGGCTGGAC  
 LFLE 3' aggagcgcttctgcccggccgctccgctctgggaggtCTACCATGGAGGCCAGAAGCAATGTAGGGGCTGGAC  
 LAVA\_E aggagcgcttctgcccggccgctccgctctgggaggtCTACCACCGAGGCCAGAAGCAATGTAGGGGCTGGAC

**L<sub>F</sub>L<sub>E</sub>L<sub>F</sub>: 5' end - SmaI/BstAPI-blunted; 3' end - Accl-blunted/RsaI**

LAVA\_F TGAGGCCGAGTGCTCTGCCCGCTCAGCCTCCCGA cccctgcccggccaccgcccgcctctgggaggtggg  
 LFLE 5' TGAGGCCGAGTGCTCTGCCCGCTCAGCCTCCCGA cccctgcccggccaccgcccgcctctgggaggtggg  
 LAVA\_E CGCCTGCCTTGGCTACCAGGGTGCTGGGATTGCAG cccctgcccggccaccgcccgcctctgggaggtggg  
 LAVA\_E aggagcgcttctgcccggccgctccgctctgggaggtCTACCACCGAGGCCAGAAGCAATGTAGGGGCTGGAC  
 LELF 3' aggagcgcttctgcccggccgctccgctctgggaggtCTACCATGGAGGCCAGAAGCAATGTAGGGGCTGGAC  
 LAVA\_F aggagcgcttctgcccggccgctccgctctgggaggtCTACCATGGAGGCCAGAAGCAATGTAGGGGCTGGAC

**A<sub>I</sub>I: exchange at the 5' end using common Aval site**

Active TGAGGCCGAGTGCTCTGCCCGCTCAGCCTCCCGAGcccctgcccggccaccgcccgcctctgggaggtggg  
 A<sub>I</sub>I TGAGGCCGAGTGCTCTGCCCGCTCAGCCTCCCGAGcccctgcccggccaccgcccgcctctgggaggtggg  
 Inact. TGACGCCAAGTGCTCTGCCCGCTCAGCCTCCCGAGcccctgcccggccaccgcccgcctctgggaggtggg

**I<sub>A</sub>A: exchange at the 5' end using common Aval site**

Inact. TGACGCCAAGTGCTCTGCCCGCTCAGCCTCCCGAGcccctgcccggccaccgcccgcctctgggaggtggg  
 I<sub>A</sub>A TGACGCCAAGTGCTCTGCCCGCTCAGCCTCCCGAGcccctgcccggccaccgcccgcctctgggaggtggg  
 Active TGAGGCCGAGTGCTCTGCCCGCTCAGCCTCCCGAGcccctgcccggccaccgcccgcctctgggaggtggg

**A<sub>A</sub>I: exchange at the VNTR 3' end using the common Mbil site**

Active aggagcgcttctgcccggccgctccgctctgggaggtCTACCATGGAGGCCAGAAGCAATGTAGGGGCTGGAC  
 A<sub>A</sub>I aggagcgcttctgcccggccgctccgctctgggaggtCTACAATGGAGGCCAGAAGCAATGTAGGGGCTGGTC  
 Inact. aggagcgcttctgcccggccgctccgctctgggaggtCTACAATGGAGGCCAGAAGCAATGTAGGGGCTGGTC

**I<sub>I</sub>A: Accl-blunted/RsaI**

Inact. aggagcgcttctgcccggccgctccgctctgggaggtCTACAATGGAGGCCAGAAGCAATGTAGGGGCTGGTC  
 I<sub>I</sub>A aggagcgcttctgcccggccgctccgctctgggaggtCTACCATGGAGGCCAGAAGCAATGTAGGGGCTGGAC  
 Active aggagcgcttctgcccggccgctccgctctgggaggtCTACCATGGAGGCCAGAAGCAATGTAGGGGCTGGAC

**A<sub>I</sub>A: 5' end - Aval; 3' end - Accl-blunted/RsaI**

Active TGAGGCCGAGTGCTCTGCCCGCTCAGCCTCCCGAGcccctgcccggccaccgcccgcctctgggaggtggg  
 A<sub>I</sub>I TGAGGCCGAGTGCTCTGCCCGCTCAGCCTCCCGAGcccctgcccggccaccgcccgcctctgggaggtggg  
 Inact. TGACGCCAAGTGCTCTGCCCGCTCAGCCTCCCGAGcccctgcccggccaccgcccgcctctgggaggtggg  
 Inact. aggagcgcttctgcccggccgctccgctctgggaggtCTACAATGGAGGCCAGAAGCAATGTAGGGGCTGGTC  
 I<sub>I</sub>A aggagcgcttctgcccggccgctccgctctgggaggtCTACCATGGAGGCCAGAAGCAATGTAGGGGCTGGAC  
 Active aggagcgcttctgcccggccgctccgctctgggaggtCTACCATGGAGGCCAGAAGCAATGTAGGGGCTGGAC

**I<sub>A</sub>I: 5' end - Aval; 3' end - Mbil**

Inact. TGACGCCAAGTGCTCTGCCCGCTCAGCCTCCCGAGcccctgcccggccaccgcccgcctctgggaggtggg  
 I<sub>A</sub>I TGACGCCAAGTGCTCTGCCCGCTCAGCCTCCCGAGcccctgcccggccaccgcccgcctctgggaggtggg  
 Active TGAGGCCGAGTGCTCTGCCCGCTCAGCCTCCCGAGcccctgcccggccaccgcccgcctctgggaggtggg  
 Active aggagcgcttctgcccggccgctccgctctgggaggtCTACCATGGAGGCCAGAAGCAATGTAGGGGCTGGAC  
 A<sub>A</sub>I aggagcgcttctgcccggccgctccgctctgggaggtCTACAATGGAGGCCAGAAGCAATGTAGGGGCTGGTC  
 Inact. aggagcgcttctgcccggccgctccgctctgggaggtCTACAATGGAGGCCAGAAGCAATGTAGGGGCTGGTC

Sequences belonging to the *Alu*-like domains as well as those of the LAVA 3' parts are given in uppercase, VNTR sequences in lowercase. Restriction endonuclease recognition sites (or parts of them - RsaI) are underlined; sequences found in the chimeras are highlighted in yellow. The additional G resulting from cloning in chimeras L<sub>E</sub>L<sub>F</sub> 5' and L<sub>E</sub>L<sub>F</sub>L<sub>E</sub> is highlighted in black.
